# Supplementary material
Source: PubMed Central journal article supplement (PMC3473292)

Figure S1.

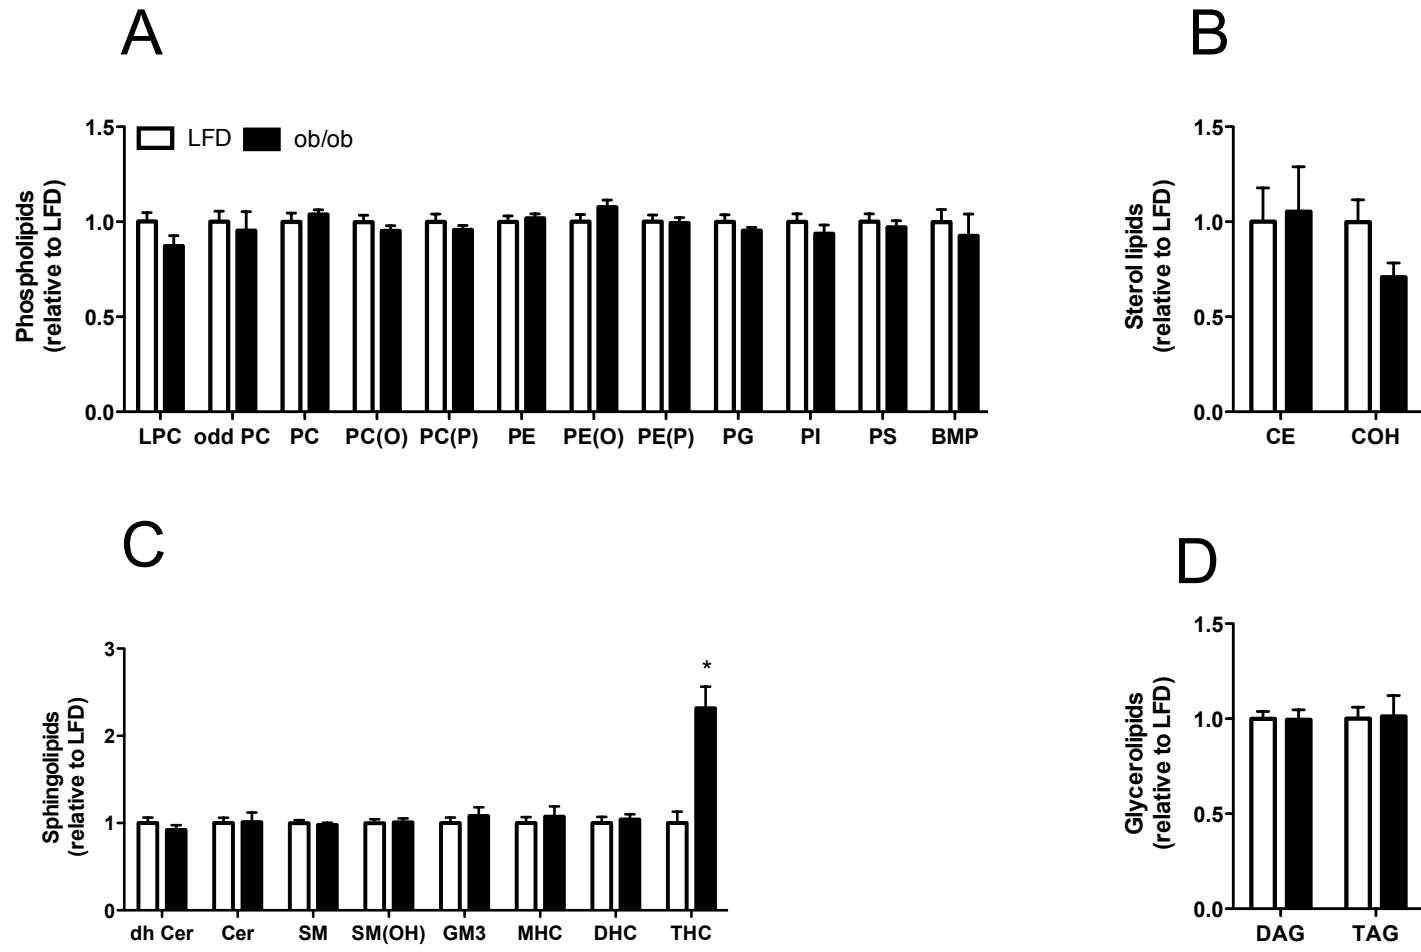

Figure S2.

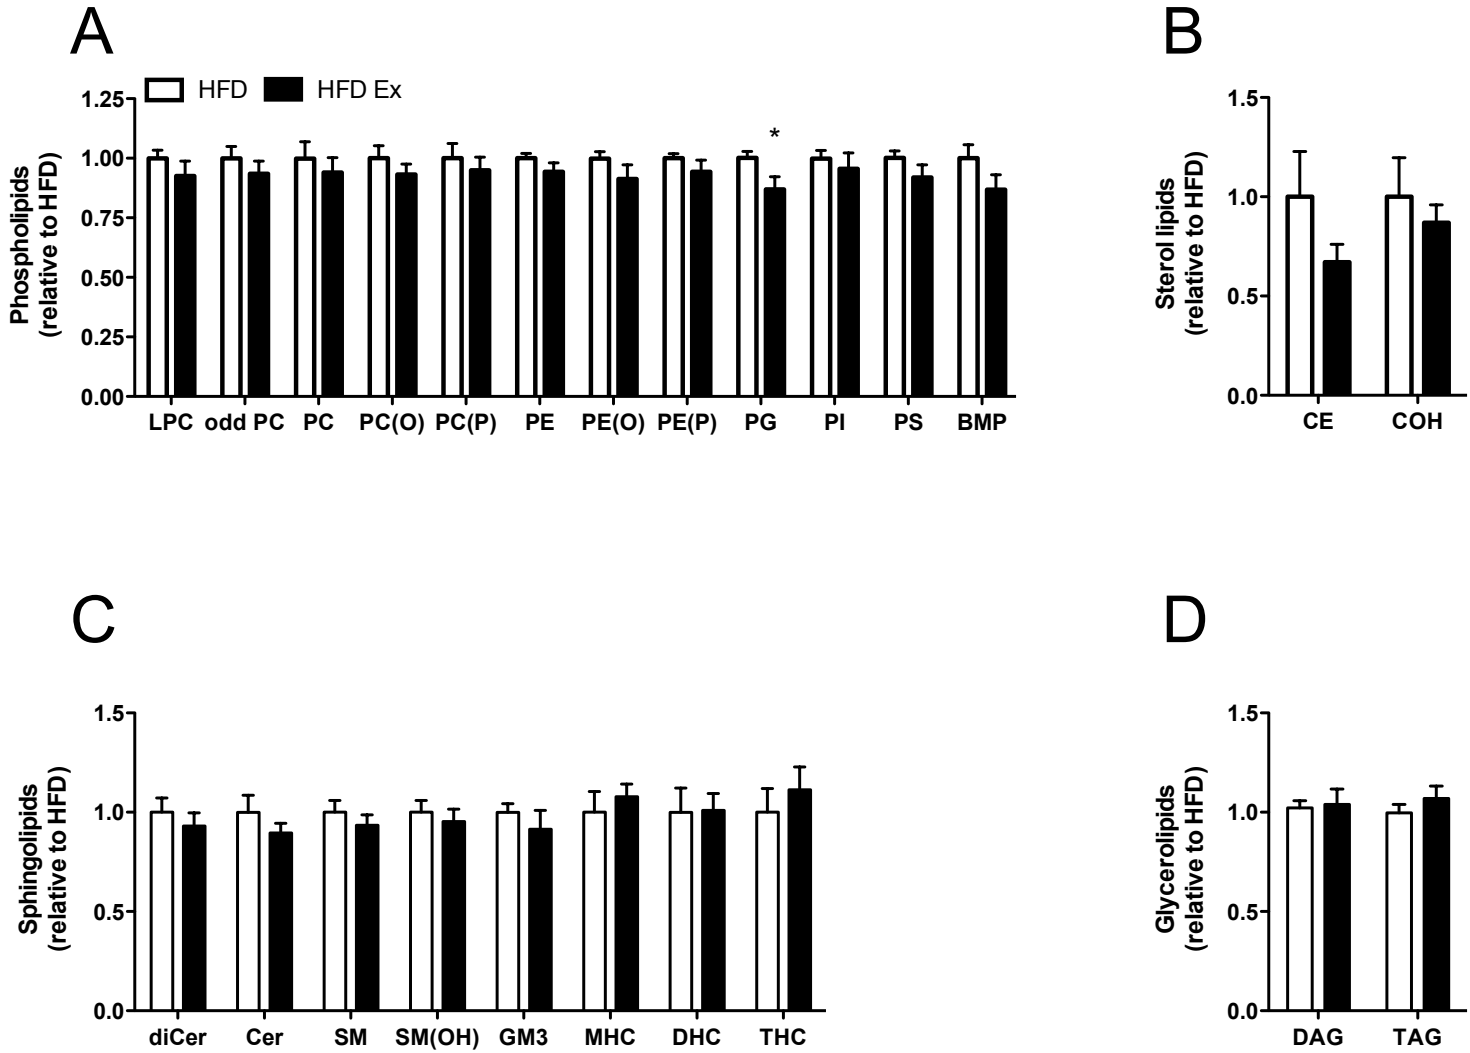

Figure S3.

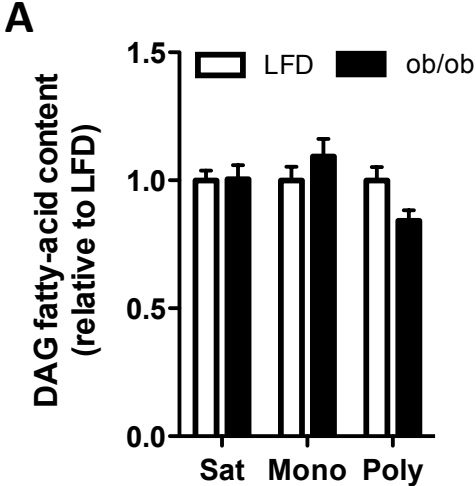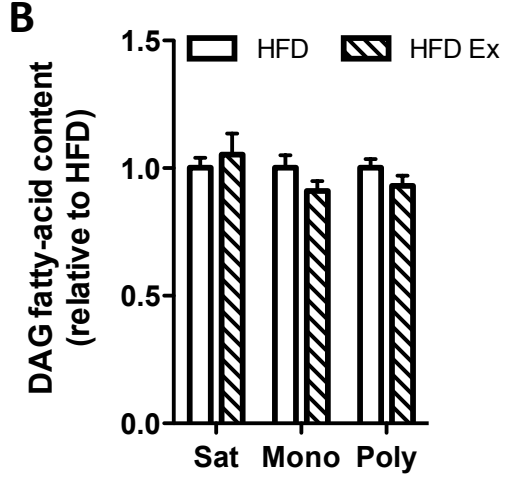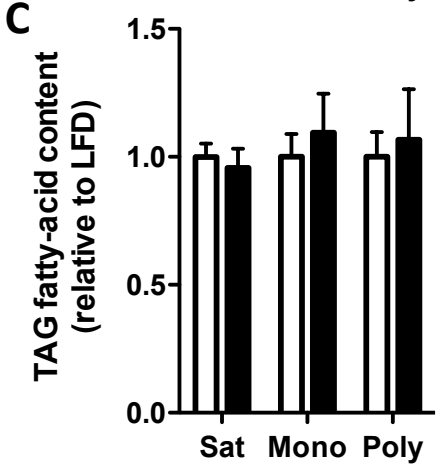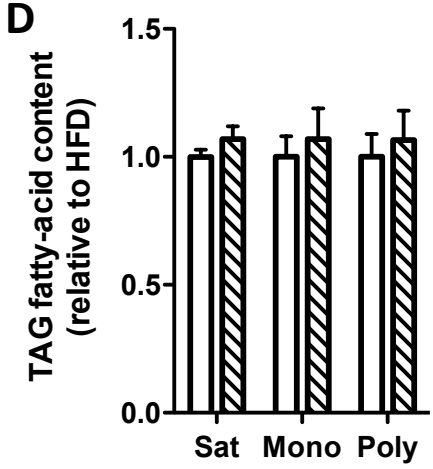

Figure S4.

**A**

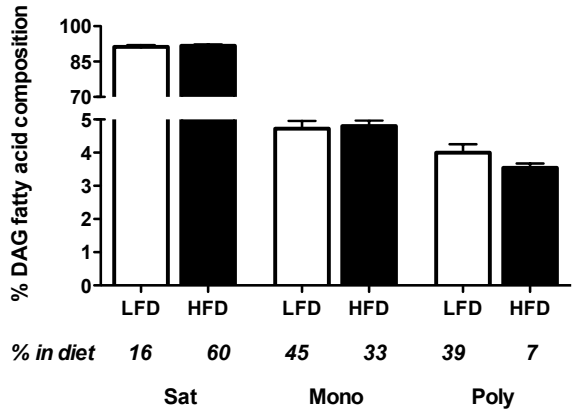

**B**

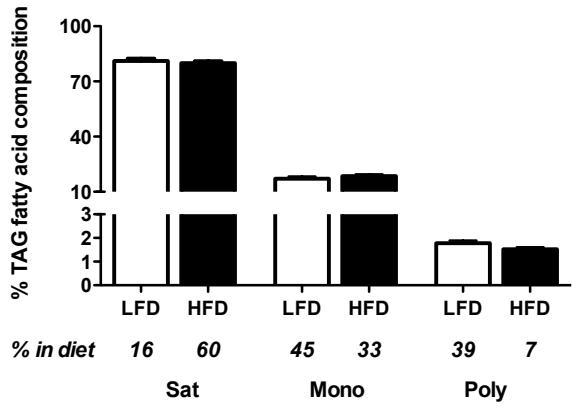

**C**

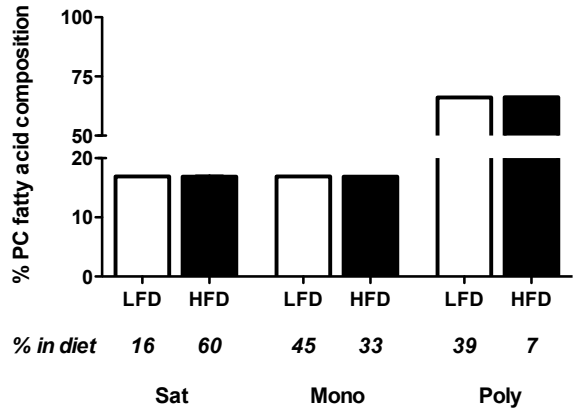

Supplement: tjp0590-4377-SD1.pdf [file tjp0590-4377-SD1.pdf]
